# Supplementary material for: Real world experience with camrelizumab in patients with advanced non-small cell lung cancer: a prospective multicenter cohort study (NOAH-LC-101)
Source: PubMed Central journal article supplement — Transl Lung Cancer Res. 2023 Apr 25;12(4):786–96. doi: 10.21037/tlcr-23-121 (PMC10183390; doi:10.21037/tlcr-23-121), 2023-04-25
Supplement: tlcr-12-04-786-dss.pdf [file tlcr-12-04-786-dss.pdf]

## Data Sharing Statement

|                     |                                                                                                                                                    |                                                                                      |
|---------------------|----------------------------------------------------------------------------------------------------------------------------------------------------|--------------------------------------------------------------------------------------|
| <b>Article Info</b> | <a href="https://dx.doi.org/10.21037/tlcr-23-121">https://dx.doi.org/10.21037/tlcr-23-121</a>                                                      |                                                                                      |
| <b>Item</b>         | <b>Question</b>                                                                                                                                    | <b>Authors' Response<br/>(place "-" if not applicable)</b>                           |
| 1                   | Would you like to share data collected for your study to others?                                                                                   | Yes                                                                                  |
| 2                   | If not, would you like to share the reason for your decision?                                                                                      | -                                                                                    |
| 3                   | What data in particular will be shared?                                                                                                            | De-identified data used for statistical analysis.                                    |
| 4                   | Any other documents will be share? Such as study protocol, statistical analysis plan, informed consent form, clinical study report, analytic code. | No                                                                                   |
| 5                   | When will data availability begin?                                                                                                                 | From the publication date.                                                           |
| 6                   | When will data availability end?                                                                                                                   | One year within the publication date.                                                |
| 7                   | To whom will you share the data?                                                                                                                   | Medical oncologists who are interested in studies of camrelizumab.                   |
| 8                   | For what type of analysis or purpose?                                                                                                              | For analysis to evaluate effectiveness and safety of camrelizumab in NSCLC patients. |
| 9                   | How or where can the data/documents be obtained?                                                                                                   | Upon reasonable request from the corresponding author (shuyongqian@cSCO.org.cn).     |
| 10                  | Any other restrictions?                                                                                                                            | Each request will be evaluated to balance the potential benefits and risks.          |
